# Supplementary material for: S100A16-induced adipogenesis is associated with up-regulation of 11 β-hydroxysteroid dehydrogenase type 1 (11β-HSD1)
Source: PubMed Central journal article supplement (PMC6734118; doi:10.1042/bsr20182042), 2019-09-09
Supplement: bsr20182042_Supp1.pdf [file bsr20182042_Supp1.pdf]

Supplementary Table1. Product Data-D12451

## Formula

| Product #D12451                       |                | gm%           | kcal%       |
|---------------------------------------|----------------|---------------|-------------|
| Protein                               |                | 24            | 20          |
| Carbohydrate                          |                | 41            | 35          |
| Fat                                   |                | 24            | 45          |
|                                       | <b>Total</b>   |               | 100         |
|                                       | <b>kcal/gm</b> | 4.73          |             |
| Ingredient                            |                | gm            | kcal        |
| Casein, 30 Mesh                       |                | 200           | 800         |
| L-Cystine                             |                | 3             | 12          |
| Corn Starch                           |                | 72.8          | 291         |
| Maltodextrin 10                       |                | 100           | 400         |
| Sucrose                               |                | 172.8         | 691         |
| Cellulose, BW200                      |                | 50            | 0           |
| Soybean Oil                           |                | 25            | 225         |
| Lard*                                 |                | 177.5         | 1598        |
| Mineral Mix S10026                    |                | 10            | 0           |
| DiCalcium Phosphate                   |                | 13            | 0           |
| Calcium Carbonate                     |                | 5.5           | 0           |
| Potassium Citrate, 1 H <sub>2</sub> O |                | 16.5          | 0           |
| Vitamin Mix V10001                    |                | 10            | 40          |
| Choline Bitartrate                    |                | 2             | 0           |
| FD&C Red Dye #40                      |                | 0.05          | 0           |
| <b>Total</b>                          |                | <b>858.15</b> | <b>4057</b> |

Formulated by E. A. Ulman, Ph.D., Research Diets, Inc., 8/26/98 and 3/11/99.

\*Typical analysis of cholesterol in lard = 0.72 mg/gram.

Cholesterol (mg)/4057 kcal = 167.8

Cholesterol (mg)/kg = 195.5

**Supplementary Table 2. S100A16 Reverse Complementary Oligonucleotides**

| oligo DNA     | 5'-3'                                                            |
|---------------|------------------------------------------------------------------|
| 13MR0109-01-F | TGCTGAACAACCTGCCTTCTCCAGCTCGTTTTGGCCACTGACTGACGAGCTGGAAGGCAGTTG  |
| 13MR0109-01-R | CCTGAACAACCTGCCTTCCAGCTCGTCAGTCAGTGGCCAAAACGAGCTGGAGAAGGCAGTTG   |
| 13MR0109-02-F | TGCTGTTCTGGATGAGCTTGTTCAGCTGTTTTGGCCACTGACTGACAGCTGACACTCATCCAGA |
| 13MR0109-02-R | CCTGTTCTGGATGAGTGTTCAGCTGTTCAGTCAGTGGCCAAAACAGCTGACAAGCTCATCCAGA |
| 13MR0109-03-F | TGCTGTTCGGAAGCTGGACTTGCTGAGTTTTGGCCACTGACTGACTCAGCAAGCAGCTTCCGA  |
| 13MR0109-03-R | CCTGTTCGGAAGCTGCTTGCTGAGTCAGTCAGTGGCCAAAACCTCAGCAAGTCCAGCTTCCGA  |
| 13MR0109-04-F | TGCTGTGGTGATTCCACCAATCATGGGTTTTGGCCACTGACTGACCCATGATTTGGAATCACC  |
| 13MR0109-04-R | CCTGTGGTGATTCCAAATCATGGGTCAGTCAGTGGCCAAAACCCATGATTGGTGGAATCACC   |
| Negative-F    | TGCTGAAATGTACTGCGGTGGAGACGTTTTGGCCACTGACTGACGTCTCCACGCAGTACAT    |
| Negative-R    | CCTGAAATGTACTGCGTGGAGACGTCAGTCAGTGGCCAAAACGTCTCCACGCAGTACATT     |

**Supplementary Table 3. 11 $\beta$ -HSD1 Reverse Complementary Oligonucleotides**

| Oligo DNA    | 5'-3'                                                             |
|--------------|-------------------------------------------------------------------|
| 14MR0018-1-F | TGCTGTTTCCTTCATAGCTGTTTCTGGTTTTGGCCACTGACTGACCAGAAACATATGAAGGAAA  |
| 14MR0018-1-R | CCTGTTTCCTTCATATGTTTCTGGTCAGTCAGTGGCCAAAACCAGAAACAGCTATGAAGGAAA   |
| 14MR0018-2-F | TGCTGTAAATTGCTCCGCAAATGTCAGTTTTGGCCACTGACTGACTGACATTTGGAGCAATTTA  |
| 14MR0018-2-R | CCTGTAAATTGCTCCAAATGTCAGTCAGTCAGTGGCCAAAACACTGACATTTGCGGAGCAATTTA |
| 14MR0018-3-F | TGCTGAGGCCAAGGACACAGAGAGTGGTTTTGGCCACTGACTGACCACTCTCTGTCCTTGGCCT  |
| 14MR0018-3-R | CCTGAGGCCAAGGACAGAGAGTGGTCAGTCAGTGGCCAAAACCACTCTCTGTGTCCTTGGCCT   |
| 14MR0018-4-F | TGCTGATGATATGCCATTTCTCTTCCGTTTTGGCCACTGACTGACGGAAGAGATGGCATATCAT  |
| 14MR0018-4-R | CCTGATGATATGCCATCTCTTCCGTCAGTCAGTGGCCAAAACGGAAGAGAAATGGCATATCAT   |
| Negative-F   | TGCTGAAATGTACTGCGCGTGGAGACGTTTTGGCCACTGACTGACGTCTCCACGCAGTACATTT  |
| Negative-R   | CCTGAAATGTACTGCGTGGAGACGTCAGTCAGTGGCCAAAACGTCTCCACGCAGTACATTT     |

### Supplementary Fig. 1

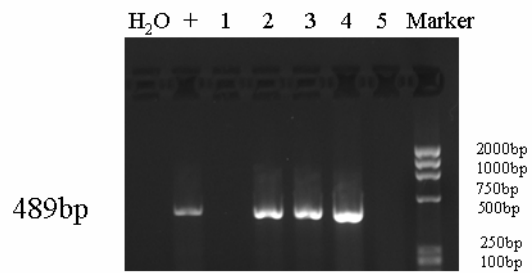

H<sub>2</sub>O: negative control, +: positive control, 1:C57BL/6,  
2:S100A16<sup>Tg/+</sup>, 3:S100A16<sup>Tg/+</sup>, 4:S100A16<sup>Tg/+</sup>, 5:S100A16<sup>Tg/+</sup>,

Primer : S100A16<sup>Tg/+</sup>-F 5'-TTGTGCTGTCTCATCATTTTGG-3'  
S100A16<sup>Tg/+</sup>-R 5'-ACCAGCCACCACCTTCTGATA-3'

### Supplementary Fig.1. Genotyping of S100A16 transgenic (S100A16<sup>Tg/+</sup>) mouse using PCR.

Total RNA from tails of C57BL/6 and S100A16<sup>Tg/+</sup> mouse was purified using Trizol Reagent (Invitrogen). The allele S100A16 was identified using PCR, and S100A16 region as shown in 489bp line in this figure. H<sub>2</sub>O: negative control, +: positive control, 1:C57BL/6, 2:S100A16<sup>Tg/+</sup>, 3:S100A16<sup>Tg/+</sup>, 4:S100A16<sup>Tg/+</sup>, 5:S100A16<sup>Tg/+</sup>, Marker: 100bp, 250bp, 500bp, 750bp, 1000bp, 2000bp.

Supplementary Fig. 2

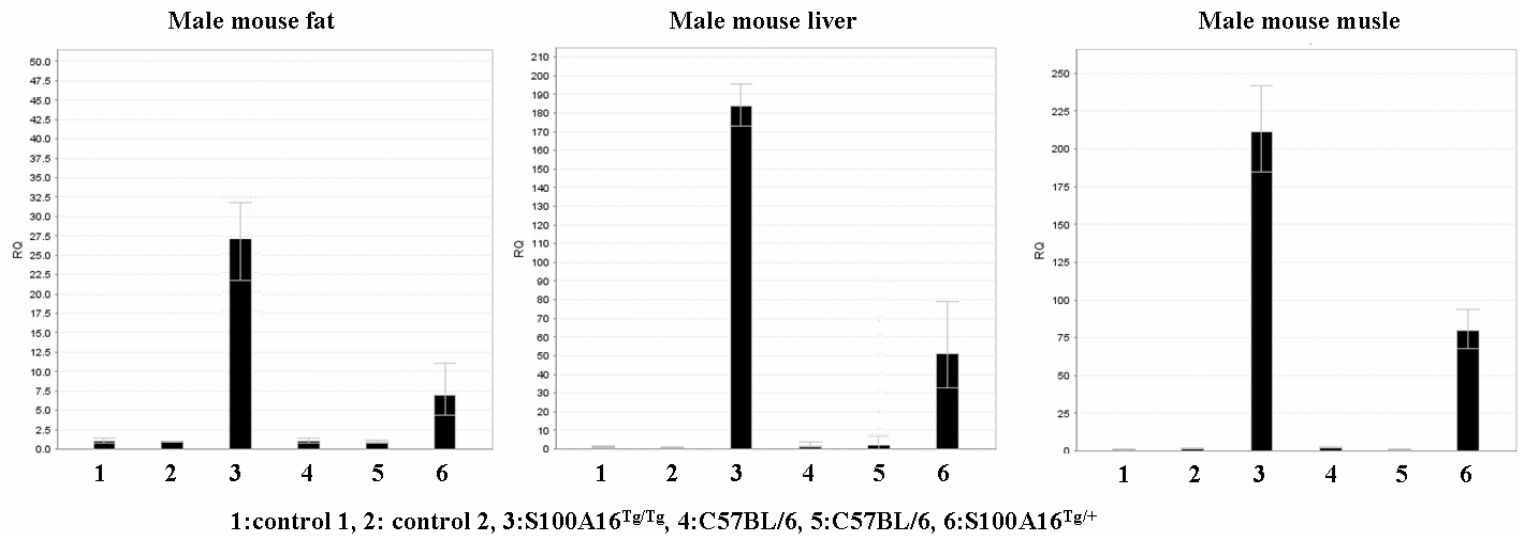

**Supplementary Fig.2. The levels of S100A16 isoforms in wild-type C57BL/6 and S100A16 transgenic heterozygous (S100A16<sup>Tg/+</sup>) mice were determined by Q-PCR.**

Total RNAs from fat, liver, and muscle of the male mice were purified using Trizol Reagent. The primers are  $\beta$ -actin-F 5'-TGACGTGGACATCCGCAAAG-3',  $\beta$ -actin-R 5'-CTGGAAGGTGGACAGCGAGG-3'; S100A16-F 5'-AGTACAGCCTGGTCAAGACA-3', S100A16-R 5'-TCCCTGTGTCCGACAGCAT-3'. For the Q-PCR reaction, the total RNA was mixed with the primers according to the manufacturer's instructions of the SYBR Premix Ex Taq (TAKARA RR420A).

Supplementary Fig. 3

**A Targeted disruption of the S100A16 locus in mice**

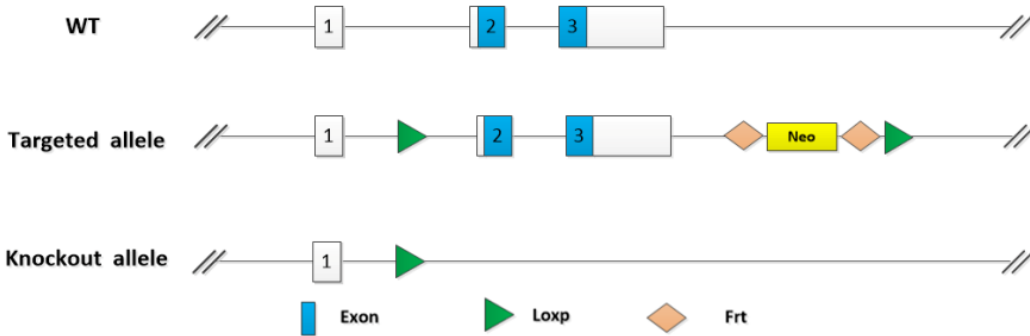

**B Genotyping primers**

**Primer 1** S100A16<sup>KO/+</sup>-1F 5'-ACTACCTTAGAGCC TATGCAAGG-3',  
S100A16<sup>KO/+</sup>-1R 5'-GCTCCTGTGAGGAGAGGAAGC-3'  
Wt:246bp; Flox:364bp

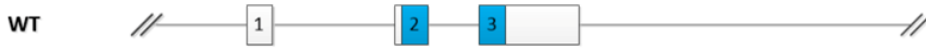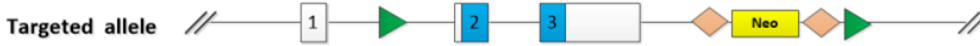

1F 1R

**Primer 2** S100A16<sup>KO/+</sup>-2F 5'-ACTACCTTAGAGCCTATGCAAGG-3',  
S100A16<sup>KO/+</sup>-2R 5'-GAGAGCTAGG AGGAGTGGATG-3' '  
KO:388bp; Wt: no band (2.725 kb)

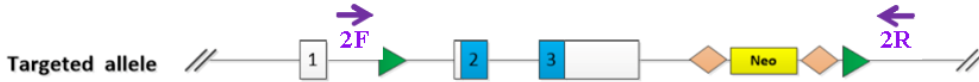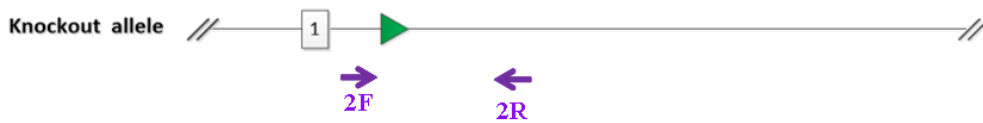

**C PCR results**

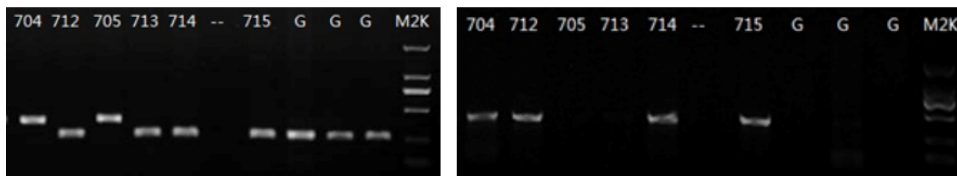

primer1: Wt: 246bp; Flox: 364bp primer2: KO: 388bp; Wt: no band (2.725kb)

G: genome --: H<sub>2</sub>O M2K:DL2000:2000,1000,750,500,250,100

704#: S100A16<sup>fl/KO</sup>  
705#: S100A16<sup>fl/fl</sup>  
713#: S100A16<sup>WT/WT</sup>  
714#: S100A16<sup>WT/ko</sup>

704#: S100A16<sup>WT/KO</sup>  
705#: WT  
713#: WT  
714#: S100A16<sup>WT/ko</sup>

### **Supplementary Fig.3. Targeted Disruption of the s100a16 Locus.**

S100A16 Knockout heterozygous mouse (S100A16<sup>KO/+</sup>) were generated at the Model Animal Research Center Of Nanjing University. Loxp points were added before the second exon and behind the third exons in the N-terminal sequence of s100a16 gene (A). Embryonic stem cells with one of the s100a16 alleles deleted were used to create chimeras and further develop a stable heterozygous mouse strain. The mice were then back-crossed with C57BL/6 mice. The genotype of fetuses was determined by genomic PCR with specific primers (B). S100A16<sup>KO/+</sup>-1F 5'-ACTACCTTAGAGCC TATGCAAGG-3', S100A16<sup>KO/+</sup>-1R 5'-GCTCCTGTGAGGAGAGGAAGC-3'; S100A16<sup>KO/+</sup>-2F 5'-ACTACCTTAGAGCCTATGCAAGG-3', S100A16<sup>KO/+</sup>-2R 5'-GAGAGCTAGG AGGAGTGGATG-3'. (C), tails were cutted from the mice and total RNAs from tails were purified using Trizol Reagent. PCR was used to determine the genotypes of mice with specific primers.
